# Supplementary material for: Dual light-responsive shape transformations of a nanocomposite hydrogel sheet enabled by in situ etching shaped plasmonic nanoparticles
Source: Royal Society of Chemistry journal article supplement (doi:10.1039/d4ra03024a), 2024-01-01
Supplement: d4ra03024a1.pdf [file d4ra03024a1.pdf]

## Dual light-responsive shape transformations of a nanocomposite hydrogel sheet enabled by in-situ etching shaped plasmonic nanoparticles

Hongyu Guo,<sup>\*a</sup> Qiao Ding, <sup>b</sup>Yang Yang, <sup>c</sup> Chenguang Du<sup>d</sup> and Zhihong Nie<sup>\*e</sup>

<sup>a</sup> Jiangxi Key Laboratory for Mass Spectrometry and Instrumentation, East China University of Technology, Nanchang 330013, P. R. China. E-mail: guohy89@ecut.edu.cn.

<sup>b</sup> National R&D Center for Freshwater Fish Processing, College of Life Sciences, Jiangxi Normal University, Nanchang 330022, P. R. China.

<sup>c</sup> State Key Laboratory of Supramolecular Structure and Materials, Jilin University, Changchun 130012, P. R. China..

<sup>d</sup> School of Medicine, University of North Carolina at Chapel Hill, Chapel Hill, North Carolina, USA

<sup>e</sup> State Key Laboratory of Molecular Engineering of Polymers, Department of Macromolecular Science, Fudan University, Shanghai 200438, P. R. China. E-mail: znie@fudan.edu.cn

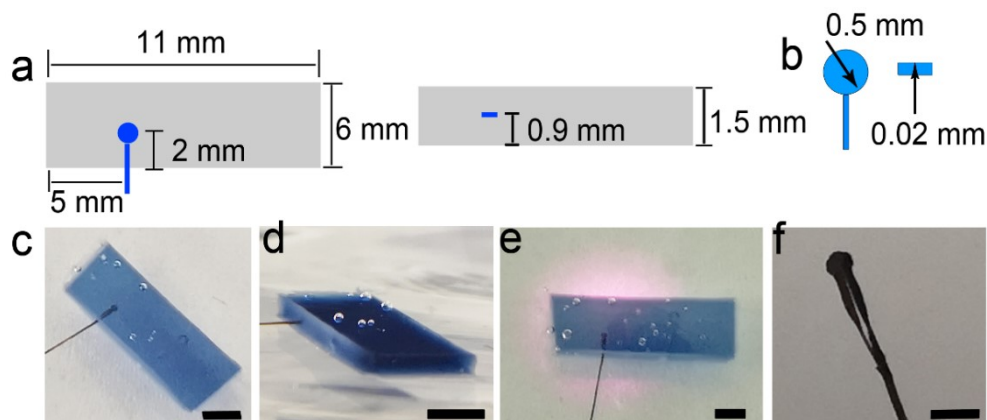

Figure S1. a) Dimensions of the hybrid hydrogel sheet (length: 11 mm; width: 6 mm; thickness: 1.5 mm) with silver nanoprisms and the location of the thermo-couple (colored blue) in the sheet used for temperature measurement under laser irradiation of 808 nm wavelength; b) dimensions of the thermo-couple used; c, d, e) different views of the hybrid sheet with silver nanoprisms and the inserted thermo-couple shown by the photo images; f) photo image of the thermo couple used. Scale bar: 3 mm in c-e) and 1 mm in f).

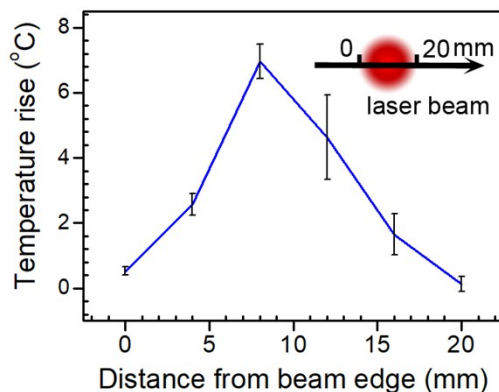

Figure S2. Rough measurement on the laser intensity distribution within the laser spot by using the thermo couple that was irradiated by laser for 5 seconds in water. A higher temperature rise suggests a larger laser intensity in the laser spot.
